# Supplementary material for: Highly selective one-step CO 2 conversion to liquid alcohols through plasma synergistic MOF catalysis
Source: Royal Society of Chemistry journal article supplement (doi:10.1039/d5ta08488a), 2026-01-01
Supplement: d5ta08488a1.pdf [file d5ta08488a1.pdf]

## Supporting Information

### Highly selective one-step CO<sub>2</sub> conversion to liquid alcohols through plasma synergistic MOFs catalysis

Chong Qi<sup>a,b,†</sup>, Pengchen He<sup>a,†</sup>, Yuan Gao<sup>a</sup>, Dengke Xi<sup>a</sup>, Yuxuan Xu<sup>a,b</sup>, Liguang Dou<sup>a</sup>,

Li Lv<sup>a,c</sup>, Cheng Zhang<sup>a,b</sup>, Tao Shao<sup>\*a,b</sup>

<sup>a</sup> Beijing International S&T Cooperation Base for Plasma Science and Energy

Conversion, Institute of Electrical Engineering, Chinese Academy of Sciences,

Beijing 100190, China

<sup>b</sup> University of Chinese Academy of Sciences, Beijing 100049, China

<sup>c</sup> Hefei University of Technology, Anhui 230009, China

\*Corresponding authors

Email: [st@mail.iee.ac.cn](mailto:st@mail.iee.ac.cn)

<sup>†</sup>Chong Qi and Pengchen He contributed equally to this work.

---

|    |                                                                 |
|----|-----------------------------------------------------------------|
| 1  | <b>Contents</b>                                                 |
| 2  | <b>1. Characterization of fresh X% Co/Cu-BDC-NH<sub>2</sub></b> |
| 3  | <b>2. Electrical characterization</b>                           |
| 4  | <b>3. <sup>1</sup>HNMR spectra of major liquid products</b>     |
| 5  | <b>4. Catalyst stability results</b>                            |
| 6  | <b>5. Characterization of spent catalysts</b>                   |
| 7  | <b>6. CO<sub>2</sub>-TPD results</b>                            |
| 8  | <b>7. CO-DRIFTS characterization results</b>                    |
| 9  | <b>8. Plasma-coupled in-situ infrared spectroscopy results</b>  |
| 10 | <b>9. Supplementary tables</b>                                  |
| 11 |                                                                 |
| 12 |                                                                 |

---

1 **1. Characterization of fresh X% Co/Cu-BDC-NH<sub>2</sub>**

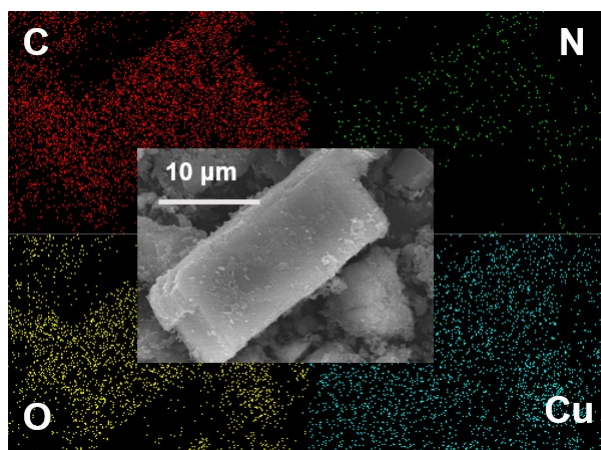

2

3 **Figure S1.** Scanning electron microscope (SEM) images of Cu-BDC-NH<sub>2</sub> and SEM

4 mapping of Cu-BDC-NH<sub>2</sub>.

5

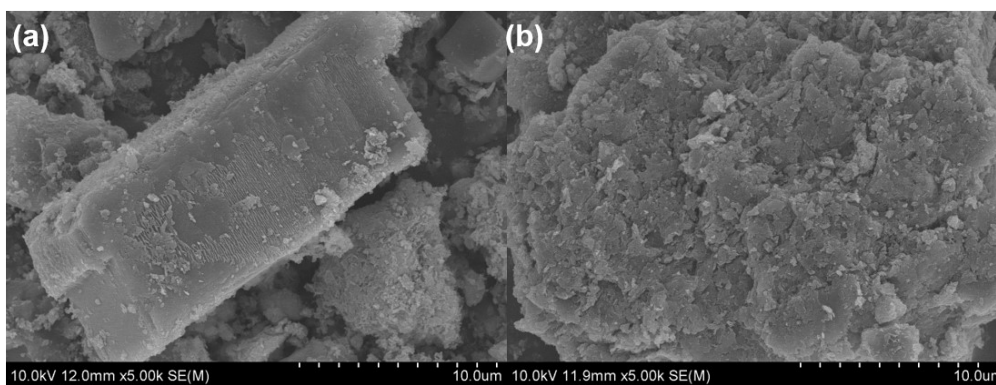

1  
2 **Figure S2.** SEM images of (a) Cu-BDC-NH<sub>2</sub> and (b) 10% Co/Cu-BDC-NH<sub>2</sub>.  
3

1 **Table S1.** Inductively coupled plasma optical emission spectrometry (ICP-OES)  
 2 analysis of 5% Co/Cu-BDC-NH<sub>2</sub>, 10% Co/Cu-BDC-NH<sub>2</sub> and 15% Co/Cu-BDC-NH<sub>2</sub>.

| Catalyst                      | Co content (wt%) |
|-------------------------------|------------------|
| 5% Co/Cu-BDC-NH <sub>2</sub>  | 4.4              |
| 10% Co/Cu-BDC-NH <sub>2</sub> | 8.5              |
| 15% Co/Cu-BDC-NH <sub>2</sub> | 14.2             |

3

4

1 **Table S2.**  $S_{\text{BET}}$ , pore volume and pore diameter of fresh catalysts.

| Samples                       | $S_{\text{BET}}^{\text{a}}$<br>( $\text{m}^2/\text{g}$ ) | Pore volume <sup>b</sup><br>( $\text{cm}^3/\text{g}$ ) | Pore diameter <sup>c</sup><br>(nm) |
|-------------------------------|----------------------------------------------------------|--------------------------------------------------------|------------------------------------|
| Cu-BDC-NH <sub>2</sub>        | 24.5                                                     | 0.06                                                   | 10.5                               |
| 10% Co/Cu-BDC-NH <sub>2</sub> | 10.4                                                     | 0.06                                                   | 21.6                               |

2      <sup>a</sup>The Brunauer-Emmett-Teller (BET) method was used to determine the specific  
3 surface area of samples.

4      <sup>b</sup>The single point method (at  $p/p^0 = 0.99$ ) was used to determine the total pore  
5 volume.

6      <sup>c</sup>The BJH method was used to determine the average pore diameter.

7

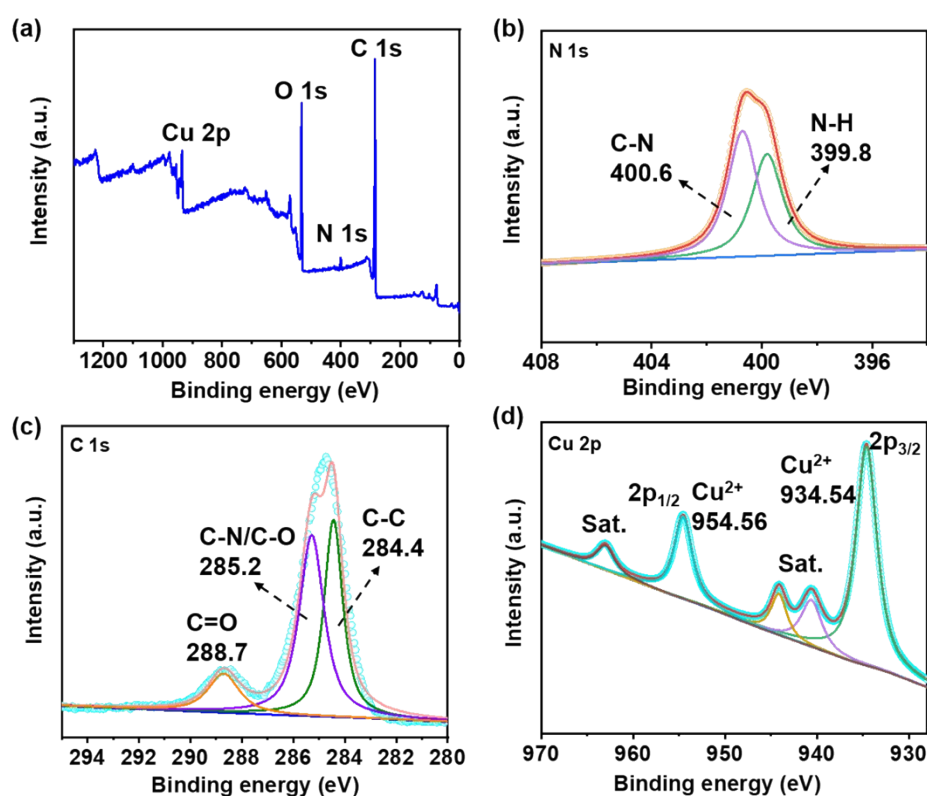

1  
2 **Figure S3.** (a) Survey XPS spectra, (b) N1s XPS profiles, (c) C1s XPS profiles and (d)  
3 Cu 2p XPS profiles of Cu-BDC-NH<sub>2</sub>.

4

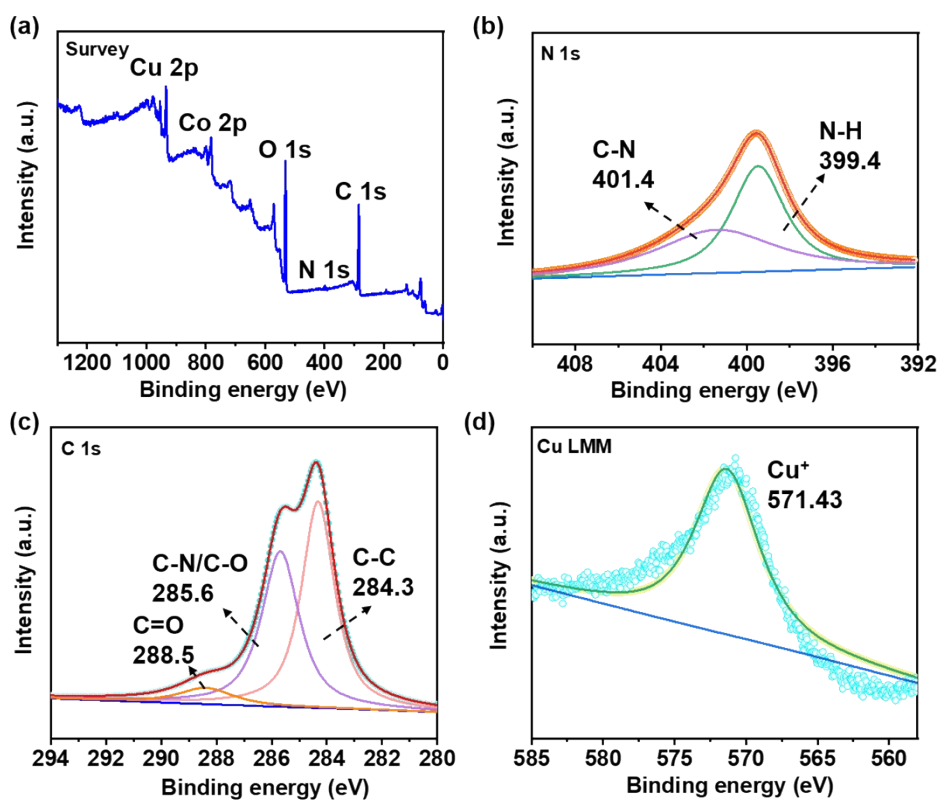

1  
2 **Figure S4.** (a) Survey XPS spectra, (b) N1s XPS profiles, (c) C1s XPS profiles and (d)  
3 Auger Cu LMM spectrum of 10% Co/Cu-BDC-NH<sub>2</sub>.

4

## 2. Electrical characterization

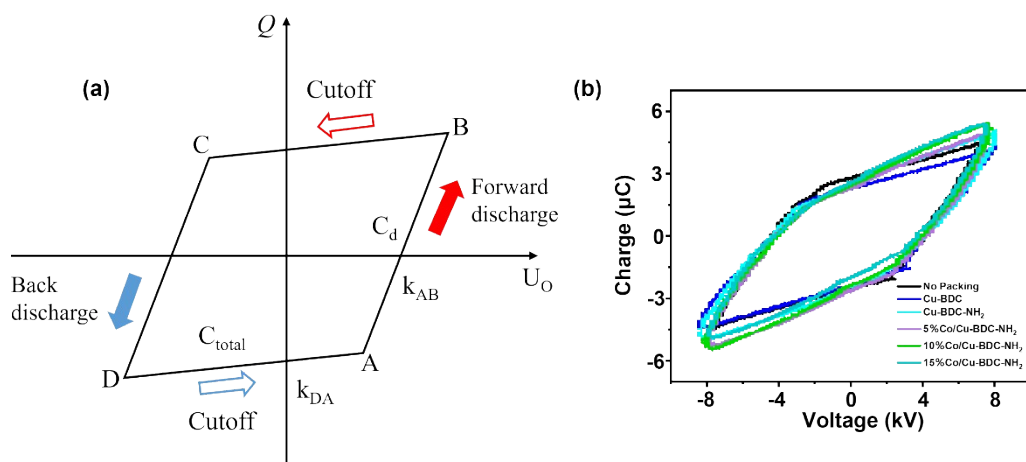

**Figure S5.** (a) The standard Lissajous figures and (b) the actual measured Lissajous figure.

Within each cycle of the sinusoidal voltage excitation, the gas gap in the dielectric barrier discharge (DBD) reactor undergoes two breakdown and two quenching events. When the applied voltage rises positively to the breakdown threshold, the gap breaks down and discharges, entering a conducting state, during which the voltage amplitude decreases. After the discharge quenches, the voltage continues to follow the sinusoidal waveform. An identical process occurs during the negative half-cycle. According to its equivalent circuit model (**Figure S5a**), the entire system can be represented by the series combination of the dielectric capacitor ( $C_d$ ) and the gap capacitor ( $C_g$ ) when the gas gap is not broken. Upon breakdown, the gap behaves as a short circuit, leaving only the dielectric capacitor in the circuit. This physical process manifests as linear segments with different slopes in the Lissajous figure. The slope of each linear segment in the figure has a clear physical meaning: it directly corresponds to the instantaneous equivalent capacitance of the system in that specific state. Specifically, the discharge stage (AB and CD section), and its slope corresponds to the dielectric capacitance  $C_d$ . The cut-off stage (DA and BC segments), and its slope corresponds to the total capacitance  $C_{total}$  of the system.

$$C_d = k_{AB} \quad (S1)$$

---


$$C_{total} = k_{DA} \quad (S2)$$

Based on the series relationship of capacitors, the gap capacitance  $C_g$  can be calculated:

$$C_g = \frac{C_d \times C_{total}}{C_d - C_{total}} \quad (S3)$$

According to **Table S3**, the system capacitance increased progressively from 28.5 pF (no catalyst) to 62.6 pF (15% Co/Cu-BDC-NH<sub>2</sub>) with catalyst filling, while the discharge power varied between 22.4 W and 26.7 W.

**Table S3.** Capacitances properties

| Sample                        | $C_d$ (pF) | $C_{total}$ (pF) | $C_g$ (pF) | P (W) |
|-------------------------------|------------|------------------|------------|-------|
| Plasma                        | 132.2±1.0  | 23.5±1.0         | 28.5±1.0   | 23.4  |
| Cu-BDC                        | 114.4±2.0  | 24.1±1.0         | 30.5±1.0   | 25.8  |
| Cu-BDC-NH <sub>2</sub>        | 111.1±1.0  | 31.4±2.0         | 43.7±1.0   | 22.4  |
| 5%Co/ Cu-BDC-NH <sub>2</sub>  | 110.5±1.0  | 34.8±1.0         | 50.8±1.0   | 25.6  |
| 10%Co/ Cu-BDC-NH <sub>2</sub> | 117.3±1.0  | 38.8±2.0         | 57.9±1.0   | 25.1  |
| 15%Co/ Cu-BDC-NH <sub>2</sub> | 120.2±1.0  | 41.2±1.0         | 62.6±1.0   | 26.7  |

---

1 3.  $^1\text{H}$ NMR spectra of major liquid products

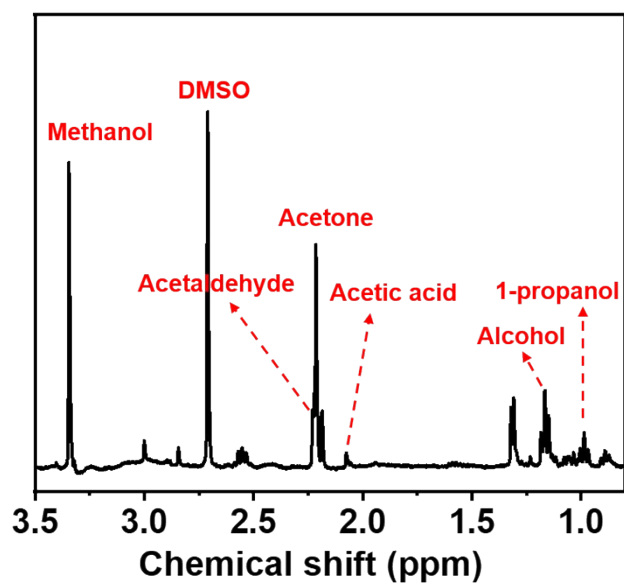

2

3 **Figure S6.**  $^1\text{H}$ NMR spectra of major liquid products.

4

# 4. Catalyst stability results

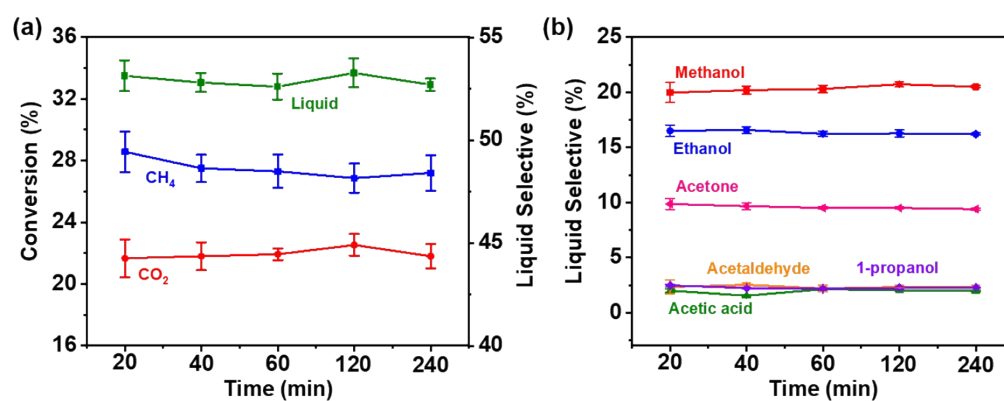

**Figure S7.** Catalyst stability using 10% Co/Cu-BDC-NH<sub>2</sub> (a) gas conversion and total liquid selectivity and (b) selectivity of main liquid products over time on stream.

## 5. Characterization of spent catalysts

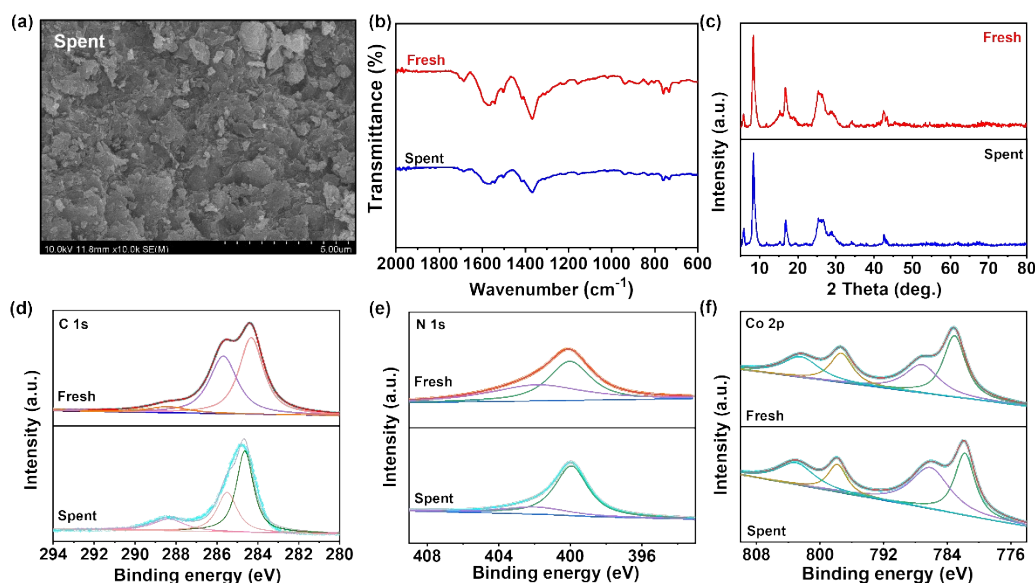

**Figure S8.** Characterization of fresh and spent 10% Co/Cu-BDC-NH<sub>2</sub> (a) SEM images (b) FTIR spectra and (c) XRD patterns. XPS spectra of (d) C 1s (e) N 1s and (f) Co 2p.

A comparison of the FTIR spectra before and after the reaction revealed the peak positions and shapes remained largely identical, while the intensities changed significantly. The high consistency in peak position and shape indicated that the main framework, core functional groups, and local chemical environment of the catalyst were not irreversibly altered or substantially degraded, preliminarily confirming its good chemical and structure stability. In contrast, the significant changes in absorption intensity suggested an evolution in the catalyst's physical state. This was supported by XRD analysis, which showed a slight decrease in the crystallinity of the catalyst after reaction. The reduction in long-range order directly affected the infrared absorption efficiency of lattice vibrations, leading to an overall weakening of the characteristic peak intensity. Therefore, the observed spectral intensity changes were attributed primarily to the evolution of the catalyst's physical structure — such as its crystallinity and micro-ordering — rather than to any fundamental change in its chemical composition.

---

1        Analysis of the C1s XPS spectra before and after reaction showed that the intensity  
2 of C-C/C-H peak at 284.3 eV remained unchanged. This indicated that the basic carbon  
3 skeleton of the catalyst remained stable during the reforming reaction, without  
4 significant consumption or coverage. Concurrently, a decrease in the intensity of the C-  
5 N/C-O peak at 285.6 eV was observed, while that of the C=O peak at 288.5 eV  
6 increased. This change was likely due to the formation of carbonyl-rich (C=O)  
7 intermediate or oxygen-containing species during the reaction, which became strongly  
8 adsorbed or chemically bonded to the catalyst surface, thereby directly enhancing the  
9 C=O signal. This inference was further corroborated by the corresponding C=O  
10 signatures observed via plasma-coupled in-situ infrared spectroscopy. Moreover,  
11 analysis of the post-reaction N 1s spectrum revealed a reduction in the C-N peak at  
12 401.4 eV, consistent with the decrease noted in the C 1s spectrum.

13

## 1 6. CO<sub>2</sub>-TPD results

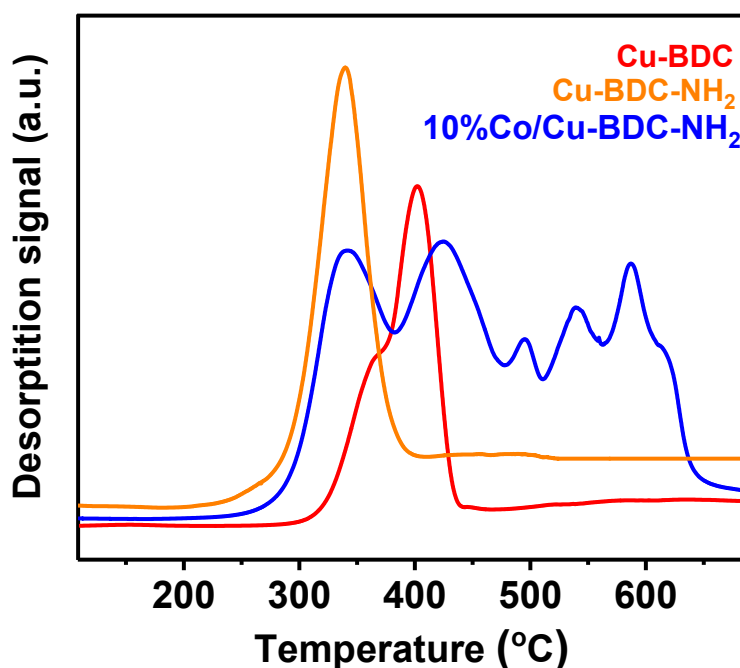

2

3 **Figure S9.** CO<sub>2</sub>-TPD of Cu-BDC, Cu-BDC-NH<sub>2</sub> and 10% Co/Cu-BDC-NH<sub>2</sub>.

4 As shown, Cu-BDC-NH<sub>2</sub> exhibited higher CO<sub>2</sub> adsorption capacity than pristine Cu-  
5 BDC, confirming that -NH<sub>2</sub> functionalization enhanced CO<sub>2</sub> capture and promoted its  
6 conversion. SEM and TEM analysis indicated that Co exists in the form of  
7 nanoparticles. These nanoparticles not only exposed abundant strong Lewis basic sites  
8 but also directly interacted with CO<sub>2</sub> to form stable carbonate species that require higher  
9 temperature for desorption. Furthermore, the introduction of Co may induce local  
10 structural reconstruction of the support, generating defects such as coordination  
11 unsaturated metal sites or oxygen vacancies. These defect sites typically exhibited a  
12 strong affinity for CO<sub>2</sub> adsorption. Consequently, Co loading directly introduced a new  
13 strongly basic active phase and indirectly created highly active defect sites. This dual  
14 effect resulted in the appearance of a significant additional adsorption peak in the high  
15 temperature region of the CO<sub>2</sub>-TPD profile.

16

## 7. CO-DRIFTS characterization results

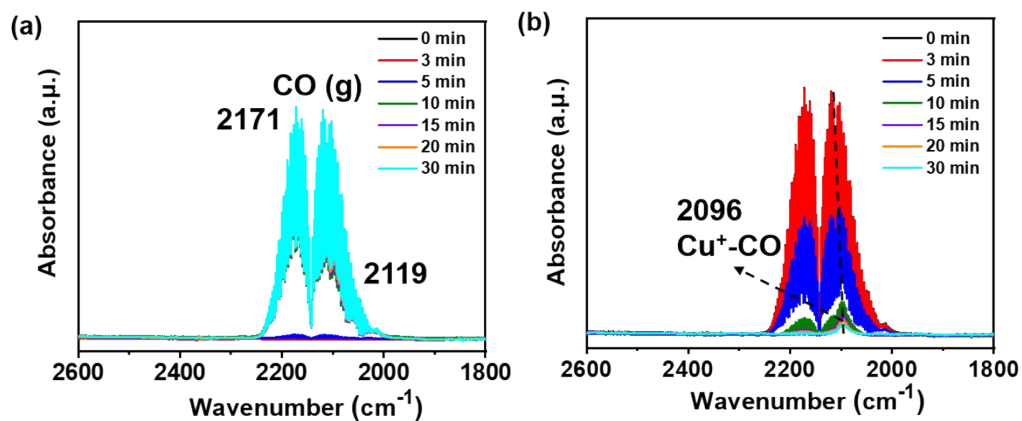

**Figure S10.** (a) DRIFT spectra of Cu-BDC-NH<sub>2</sub> during CO adsorption. (b) DRIFT spectra of Cu-BDC-NH<sub>2</sub> after CO adsorption with subsequent Ar flush.

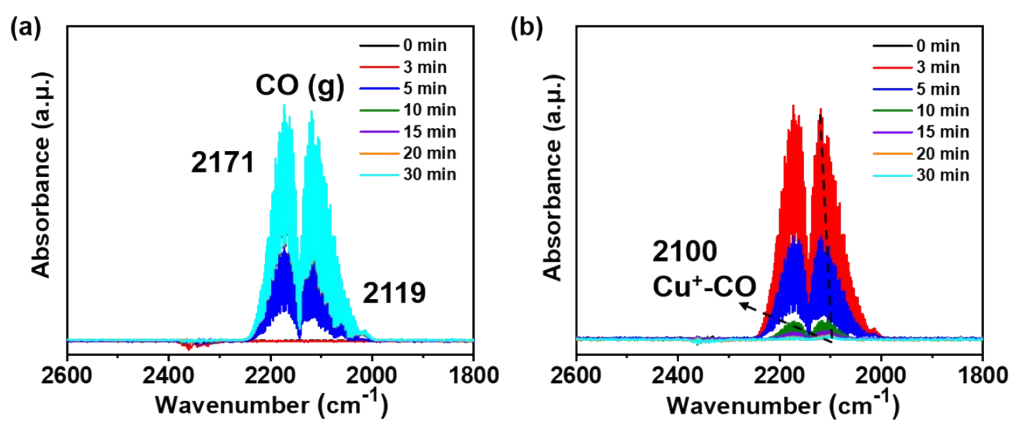

1  
 2 **Figure S11.** (a) DRIFT spectra of 10% Co/Cu-BDC-NH<sub>2</sub> during CO adsorption. (b)  
 3 DRIFT spectra of 10% Co/Cu-BDC-NH<sub>2</sub> after CO adsorption with subsequent Ar flush.  
 4

## 8. Plasma-coupled in-situ infrared spectroscopy results

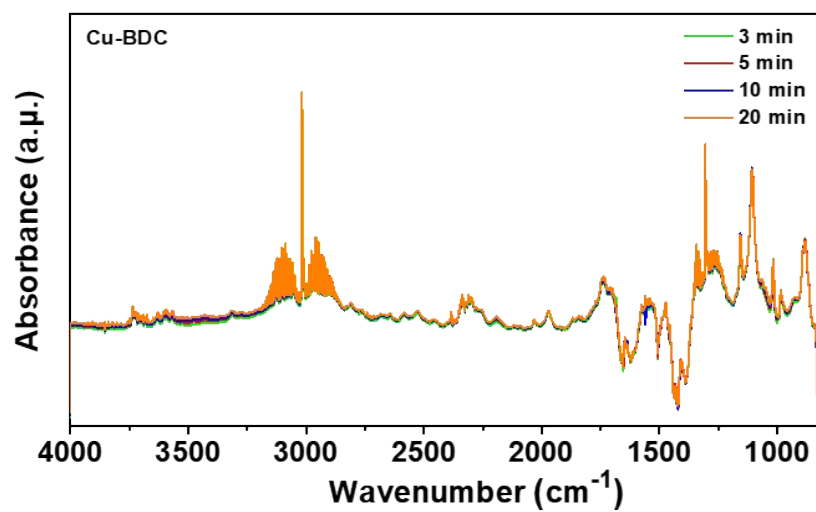

**Figure S12.** Plasma-coupled in-situ infrared spectroscopy of Cu-BDC during plasma-catalytic DRM reaction ( $\text{CO}_2/\text{CH}_4 = 1:1$ , total gas flow rate = 30 mL/min, discharge power = 20 W)

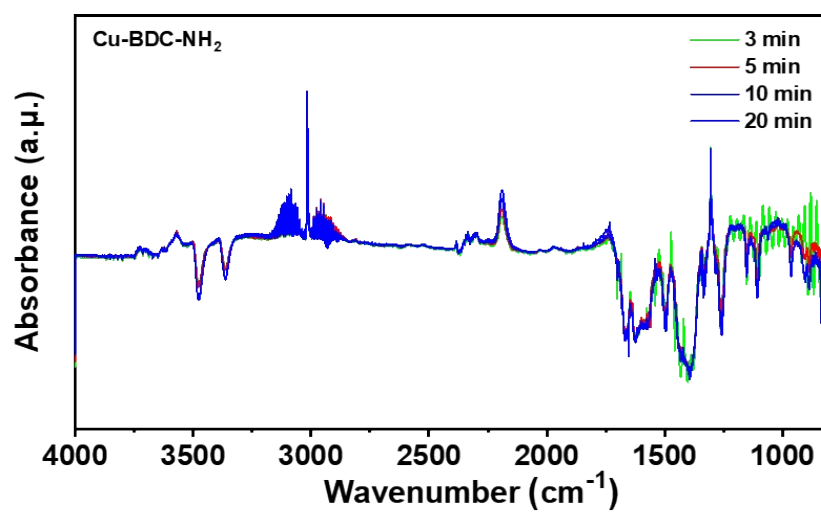

1

2 **Figure S13.** Plasma-coupled in-situ infrared spectroscopy of Cu-BDC-NH<sub>2</sub> during  
3 plasma-catalytic DRM reaction (CO<sub>2</sub>/CH<sub>4</sub> = 1:1, total gas flow rate = 30 mL/min,  
4 discharge power = 20 W)

5

6

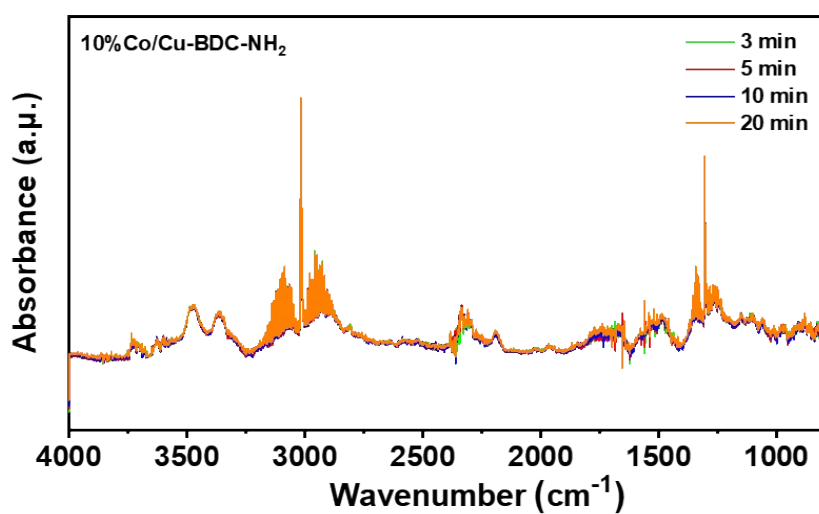

1  
2 **Figure S14.** Plasma-coupled in-situ infrared spectroscopy of 10% Co/Cu-BDC-NH<sub>2</sub>  
3 during plasma-catalytic DRM reaction (CO<sub>2</sub>/CH<sub>4</sub> = 1:1, total gas flow rate = 30  
4 mL/min, discharge power = 20 W)  
5

---

1 **9. Supplementary tables**

2 **Table S4.** Effect of catalysts on the conversion and total liquid selectivity (total flow  
 3 rate = 40 mL/min, discharge power = 25 W).

| Sample                        | CO <sub>2</sub> (%) | CH <sub>4</sub> (%) | Total liquid<br>selectivity (%) | C balance (%) |
|-------------------------------|---------------------|---------------------|---------------------------------|---------------|
| No packing                    | 15.7                | 20.6                | 21.3                            | 96            |
| Cu-BDC                        | 18.3                | 23.7                | 43.1                            | 97            |
| Cu-BDC-NH <sub>2</sub>        | 19.6                | 24.9                | 45.4                            | 98            |
| 5% Co/Cu-BDC-NH <sub>2</sub>  | 19.1                | 24.4                | 48.3                            | 97            |
| 10% Co/Cu-BDC-NH <sub>2</sub> | 22.7                | 27.1                | 53.9                            | 98            |
| 15% Co/Cu-BDC-NH <sub>2</sub> | 18.6                | 24.5                | 40.1                            | 96            |

4

1 **Table S5.** Effect of catalysts on the selectivity of gas products (total flow rate = 40  
2 mL/min, discharge power = 25 W).

| Sample                        | H <sub>2</sub><br>(%) | CO<br>(%) | C <sub>2</sub> H <sub>6</sub><br>(%) | C <sub>2</sub> H <sub>4</sub><br>(%) | C <sub>3</sub> H <sub>8</sub><br>(%) | C <sub>3</sub> H <sub>6</sub><br>(%) | C <sub>4</sub> H <sub>10</sub><br>(%) |
|-------------------------------|-----------------------|-----------|--------------------------------------|--------------------------------------|--------------------------------------|--------------------------------------|---------------------------------------|
| No packing                    | 29.3                  | 36.1      | 26.6                                 | 8.4                                  | 5                                    | 0.08                                 | 2.7                                   |
| Cu-BDC                        | 23.1                  | 28.3      | 21.1                                 | 1                                    | 4.3                                  | 0.07                                 | 2.2                                   |
| Cu-BDC-NH <sub>2</sub>        | 23.4                  | 26.8      | 20.1                                 | 0.9                                  | 4.5                                  | 0.07                                 | 2.3                                   |
| 5% Co/Cu-BDC-NH <sub>2</sub>  | 23.2                  | 25.5      | 19.2                                 | 0.9                                  | 3.9                                  | 0.06                                 | 1.8                                   |
| 10% Co/Cu-BDC-NH <sub>2</sub> | 20.2                  | 22.3      | 17.5                                 | 0.6                                  | 3.9                                  | 0.08                                 | 1.8                                   |
| 15% Co/Cu-BDC-NH <sub>2</sub> | 25.8                  | 29.9      | 21.3                                 | 1.2                                  | 4.6                                  | 0.1                                  | 2.3                                   |

3  
4  
5

1 **Table S6.** Effect of catalysts on the selectivity of liquid products (total flow rate = 40  
 2 mL/min, discharge power = 25 W).

| Samples                       | CH <sub>3</sub> OH<br>(%) | C <sub>2</sub> H <sub>5</sub> O<br>(%) | CH <sub>3</sub> COOH<br>(%) | CH <sub>3</sub> CHO<br>(%) | C <sub>3</sub> H <sub>7</sub> OH<br>(%) | C <sub>3</sub> H <sub>6</sub> O<br>(%) |
|-------------------------------|---------------------------|----------------------------------------|-----------------------------|----------------------------|-----------------------------------------|----------------------------------------|
| No packing                    | 8.6                       | 4.6                                    | 0.7                         | 0.9                        | 1.6                                     | 4.5                                    |
| Cu-BDC                        | 13.4                      | 10.6                                   | 0.5                         | 2.2                        | 4.8                                     | 11.6                                   |
| Cu-BDC-NH <sub>2</sub>        | 18.7                      | 8.6                                    | 0.9                         | 2.1                        | 3.6                                     | 11.7                                   |
| 5% Co/Cu-BDC-NH <sub>2</sub>  | 16.1                      | 10.7                                   | 1.2                         | 2.5                        | 4.4                                     | 13.4                                   |
| 10% Co/Cu-BDC-NH <sub>2</sub> | 20                        | 16.5                                   | 2.3                         | 2.3                        | 2.5                                     | 9.9                                    |
| 15% Co/Cu-BDC-NH <sub>2</sub> | 16.3                      | 11.2                                   | 0.9                         | 1.9                        | 2.2                                     | 7.2                                    |

3

1 **Table S7.** Time-on-stream stability of 10% Co/Cu-BDC-NH<sub>2</sub> about conversion and  
2 total liquid selectivity.

| Time (min) | CO <sub>2</sub> (%) | CH <sub>4</sub> (%) | Total liquid selectivity (%) |
|------------|---------------------|---------------------|------------------------------|
| 20         | 21.7                | 28.6                | 53.1                         |
| 40         | 21.8                | 27.5                | 52.8                         |
| 60         | 21.9                | 27.3                | 52.6                         |
| 120        | 22.5                | 26.9                | 53.2                         |
| 240        | 21.8                | 27.2                | 52.8                         |

3  
4

1 **Table S8.** Time-on-stream stability of 10% Co/Cu-BDC-NH<sub>2</sub> about selectivity of  
 2 liquid products (Total flow: 40 mL min<sup>-1</sup>, Discharge power: 25 W) (average value).

| Time<br>(min) | CH <sub>3</sub> OH<br>(%) | C <sub>2</sub> H <sub>5</sub> OH<br>(%) | CH <sub>3</sub> COOH<br>(%) | CH <sub>3</sub> CHO<br>(%) | C <sub>3</sub> H <sub>7</sub> OH<br>(%) | C <sub>3</sub> H <sub>6</sub> O<br>(%) |
|---------------|---------------------------|-----------------------------------------|-----------------------------|----------------------------|-----------------------------------------|----------------------------------------|
| 20            | 20.0                      | 16.5                                    | 2                           | 2.3                        | 2.5                                     | 9.9                                    |
| 40            | 20.2                      | 16.6                                    | 1.5                         | 2.5                        | 2.2                                     | 9.7                                    |
| 60            | 20.3                      | 16.2                                    | 2.1                         | 2.2                        | 2.2                                     | 9.8                                    |
| 120           | 20.7                      | 16.3                                    | 2.0                         | 2.3                        | 2.2                                     | 9.5                                    |
| 240           | 20.5                      | 16.2                                    | 2.0                         | 2.3                        | 2.3                                     | 9.4                                    |

3

4

1 **Table S9.** Spectroscopic characteristics of the main species detected in the CO<sub>2</sub>-CH<sub>4</sub>  
2 plasma.

| Species                      | Electron transition                        | Wavelength (nm) | Reference          |
|------------------------------|--------------------------------------------|-----------------|--------------------|
| CO                           | $b^3\Sigma_{2u}-a^3\Pi_{1g}$               | 283.4           | [1], [2]           |
|                              |                                            | 296.6           | [1], [2]           |
| CO <sup>+</sup>              | $B^2\Sigma-X^2\Sigma$                      | 288.8           | [1]                |
| CO <sub>2</sub> <sup>+</sup> | $A^2\Pi_u-X^2\Pi_g$                        | 305.8           | [1], [7]           |
|                              |                                            | 327             | [1], [7]           |
|                              |                                            | 351.8           | [6], [7]           |
|                              |                                            | 368.3           | [6], [7]           |
| CH                           | $A^2\Delta-X^2\Pi$                         | 431.4           | [6], [2], [3], [4] |
|                              | $B^2\Sigma-X^2\Pi$                         | 388.2           | [6], [2], [4]      |
|                              | $C^2\Sigma^+-X^2\Pi$                       | 314.6           | [6], [7], [4]      |
| CO                           | $B^1\Sigma-A^1\Pi$<br>(Angstrom<br>system) | 450.7           | [6], [8]           |
|                              |                                            | 483             | [6], [8]           |
|                              |                                            | 520             | [6], [8]           |
|                              |                                            | 559.3           | [6], [8]           |
|                              |                                            | 608.1           | [6], [8]           |
| C <sub>2</sub>               | $d^2\Pi-a^3\Pi$ (Swan)                     | 469.4           | [6], [7]           |
|                              |                                            | 471.5           | [6], [7]           |
|                              |                                            | 516.8           | [6], [7], [3]      |
| H <sub>α</sub>               | 3d-2p                                      | 656.3           | [6], [7]           |

3  
4

1 **Table S10.** Species identified in the plasma-catalytic DRM reaction over 10% Co/Cu-  
2 BDC-NH<sub>2</sub> by plasma-coupled in-situ infrared spectroscopy.

| Species                | Assignment                  | Wavenumber (cm <sup>-1</sup> ) | Reference  |
|------------------------|-----------------------------|--------------------------------|------------|
| Alcohols               | C-O stretching vibration    | 1016                           | 5          |
| *CH <sub>3</sub> O     | H-C=O bending vibration     | 1106                           | 6, 7       |
| *CH <sub>3</sub> O     | C-O stretching vibration    | 1157                           | 8, 9       |
| Bidentate carbonates   |                             | 1306                           | 10, 11     |
| Monodentate carbonates |                             | 1480                           | 10, 12     |
| -NH <sub>2</sub> COOH  | C=O stretching vibration    | 1730                           | 13,14      |
| *CO                    | Bridging CO adsorbed        | 1970                           | 15, 16     |
| *CO                    | Linear CO adsorbed          | 2032                           | 15, 17, 18 |
| CO (g)                 |                             | 2190                           | 19, 20     |
| CO <sub>2</sub> (g)    |                             | 2362                           | 21, 22     |
| *HCOO                  |                             | 2642                           | 23         |
| *CH <sub>3</sub>       | C-H stretching vibration    | 2810                           | 24,25      |
| CH <sub>4</sub> (g)    |                             | 3016                           | 26         |
| Surface OH             | O-H stretching vibration    | 3364                           | 27         |
| Isolated OH            | O-H stretching vibration    | 3566, 3600, 3625               | 28,29      |
| CO <sub>2</sub> (g)    | Overtone of CO <sub>2</sub> | 3725                           | 21         |

3

4

1 **Table S11.** Summary of conversions and liquid selectivity reported in the literature.

| Reference | CO <sub>2</sub> (%) | CH <sub>4</sub> (%) | Total liquid selectivity (%) | Alcohols selectivity (%) |
|-----------|---------------------|---------------------|------------------------------|--------------------------|
| [30]      | 18                  | 22                  | 40.1                         | 35                       |
| [31]      | 30.2                | 34.7                | 55                           | 38.3                     |
| [32]      | ~12.2               | ~22                 | ~25                          | ~10                      |
| [33]      | ~7.3                | ~11.6               | ~25                          | ~19                      |
| [34]      | ~7                  | ~17                 | ~45                          | ~38                      |
| This work | 22.7                | 27.1                | 53.9                         | 38.9                     |

2 **Table S12.** Summary of mechanisms and strategies reported in the literature.

| Reference | Strategy                | Mechanism                                                                                                                                                                                                                                              |
|-----------|-------------------------|--------------------------------------------------------------------------------------------------------------------------------------------------------------------------------------------------------------------------------------------------------|
| [30]      | DBD reactor<br>AC power | 1. Methanol is formed mainly via CH <sub>3</sub> coupling with OH radicals. 2. The pathway is enabled by efficient CO <sub>2</sub> activation and OH radical enrichment, both driven by the iron active species.                                       |
| [31]      | DBD reactor<br>AC power | 1. Liquid product formation proceeds via stepwise CO hydrogenation coupled with CH <sub>x</sub> and OH radical coupling. 2. This mechanism is facilitated by the high-performance catalyst prepared through the grinding method.                       |
| [32]      | DBD reactor<br>AC power | 1. The prepared CuSA-CN catalyst's well-defined Cu-N <sub>4</sub> single-atom sites enable acetic acid synthesis via a bidirectional mechanism. 2. The charge transfer between metal and support facilitates reactant activation, while the sites also |

---

|           |                         |                                                                                                                                                                                                                                                                                                                                                                                                                                                                                                                                                                                                |
|-----------|-------------------------|------------------------------------------------------------------------------------------------------------------------------------------------------------------------------------------------------------------------------------------------------------------------------------------------------------------------------------------------------------------------------------------------------------------------------------------------------------------------------------------------------------------------------------------------------------------------------------------------|
|           |                         | lower the energy barriers for key steps like CH <sub>4</sub> dissociation and C–C coupling.                                                                                                                                                                                                                                                                                                                                                                                                                                                                                                    |
| [33]      | DBD reactor<br>AC power | 1. Water participates as a reactant, cooperating with the copper catalyst to promote CH <sub>3</sub> and OH coupling into methanol 2. Water facilitates methanol desorption from the catalyst surface, enhancing efficiency and preventing over-conversion.                                                                                                                                                                                                                                                                                                                                    |
| [34]      | DBD reactor<br>AC power | 1. In plasma-catalyzed DRM, copper valence state and loading jointly determine alcohol product distribution. 2. Cu <sup>2+</sup> species enhance alcohol selectivity, while increased copper loading shifts the major product from methanol to ethanol.                                                                                                                                                                                                                                                                                                                                        |
| This work | DBD reactor<br>AC power | 1. The Co/Cu-BDC-NH <sub>2</sub> catalyst enhances CO <sub>2</sub> adsorption via basic -NH <sub>2</sub> groups and improves CO utilization with loaded Co. 2. Its mechanism acts as a "molecular shunt switch" to dynamically regulate the reaction pathway. 3. -NH <sub>2</sub> functionalization shifts the route from stepwise CO hydrogenation toward OH/CH <sub>x</sub> coupling. Co addition then reverses this shift, restoring CO hydrogenation as the main pathway. Co and -NH <sub>2</sub> also work together to regulate CH <sub>3</sub> O intermediate formation and consumption. |

---

1 Building upon the established mechanism by which metal active sites or metallic  
2 oxide active sites mediate the coupling of CH<sub>x</sub> and OH radicals to form oxygenated  
3 products, this study proposed a novel catalyst design strategy. The synthesized Co/Cu-

---

1 BDC-NH<sub>2</sub> material enabled dynamic modulation of the reaction pathway through the  
2 introduction of –NH<sub>2</sub> groups and Co species. Their synergistic interaction likely  
3 allowed more flexible regulation of key intermediates, thereby endowing the catalyst  
4 with enhanced CO<sub>2</sub> conversion efficiency and improved product selectivity.

5

---

## 1 References

- 2 1. Y. Wang, Y. Chen, J. Harding, H. He, A. Bogaerts and X. Tu, *Chem. Eng. J.*, 2022,  
3 **450**, 137860.
- 4 2. X. Wang, Y. Gao, S. Zhang, H. Sun, J. Li and T. Shao, *Appl. Energ.*, 2019, **243**,  
5 132-144.
- 6 3. X. Zhang, Y. Wenren, W. Zhou, J. Han, H. Lu, Z. Zhu, Z. Wu and M. S. Cha, *J.*  
7 *Phys. D Appl. Phys.*, 2020, **53**, 194002.
- 8 4. Y. Gao, L. Dou, B. Feng, C. Zhang and T. Shao, *Energ. Convers. Manage.*, 2023,  
9 **276**, 116570.
- 10 5. J. Shi, C. Mahr, M. M. Murshed, T. M. Gesing, A. Rosenauer, M. Bäumer and A.  
11 Wittstock, *Phys. Chem. Chem. Phys.*, 2017, **19**, 8880-8888.
- 12 6. Q. Zhang, S. Wang, X. Shi, M. Dong, J. Chen, J. Zhang, J. Wang and W. Fan, *Appl.*  
13 *Catal. B Environ.*, 2024, **346**, 123748.
- 14 7. J. Li, W. Pan, Q. Liu, Z. Chen, Z. Chen, X. Feng and H. Chen, *J. Am. Chem. Soc.*,  
15 2021, **143**, 6551-6559.
- 16 8. S. Deng, N. Wang, Y. Zhu and K. Thummavichai, *Catal. Sci. Technol.*, 2024, **14**,  
17 6443-6465.
- 18 9. P. Liu, Z. Huang, X. Gao, X. Hong, J. Zhu, G. Wang, Y. Wu, J. Zeng and X. Zheng,  
19 *Adv Mater.*, 2022, **34**, e2200057.
- 20 10. H. Ren, H. Yang, J. Xin, C. Wu, H. Wang, J. Zhang, X. Bu, G. Yang, J. Li, Y. Sun  
21 and P. Gao, *Appl. Catal. B Environ.*, 2024, **358**, 124440.
- 22 11. M. Zhao, J. Deng, J. Liu, Y. Li, J. Liu, Z. Duan, J. Xiong, Z. Zhao, Y. Wei, W.  
23 Song and Y. Sun, *ACS Catal.*, 2019, **9**, 7548-7567.
- 24 12. J. Hu, Y. Li, Y. Zhen, M. Chen and H. Wan, *Chin. J. Catal.*, 2021, **42**, 367-375.
- 25 13. S.-C. Yang, S. H. Pang, T. P. Sulmonetti, W.-N. Su, J.-F. Lee, B.-J. Hwang and  
26 C. W. Jones, *ACS Catal.*, 2018, **8**, 12056-12066.
- 27 14. Z. Bacsik, N. Ahlsten, A. Ziadi, G. Zhao, A. E. Garcia-Bennett, B. Martín-Matute  
28 and N. Hedin, *Langmuir*, 2011, **27**, 11118-11128.

- 
- 1 15. H. Sun, J. Lv, C. Wang, Y. Zhang, S. Sun, P. Zhang, G. Cheng, D. Mei, Y. Wang  
2 and Z. Yan, *Fuel*, 2025, **381**, 133413.
- 3 16. X. Hu, J. Xu, Y. Gao, Z. Li, J. Shen, W. Wei, Y. Hu, Y. Wu, Y. Wang and M.  
4 Ding, *Angew. Chem. Int. Ed.*, 2025, **64**, e202414416.
- 5 17. M. Liu, R. Zou and C.-j. Liu, *Appl. Catal. B Environ.*, 2025, **360**, 124549.
- 6 18. Y. Li, L. Guo, M. Du, C. Tian, G. Zhao, Z. Liu, Z. Liang, K. Hou, J. Chen, X. Liu,  
7 L. Jiang, B. Nan and L. Li, *Nat. Commun.*, 2024, **15**, 5598.
- 8 19. T. Li, H. Zhao, L. Guo, G. Liu, J. Wu, T. Xing, T. Li, Q. Liu, J. Sui, Y. Han, J.  
9 Liang, Y. He and N. Tsubaki, *ACS Catal.*, 2025, **15**, 1112-1122.
- 10 20. M. Tian, X. Tian, E. Ma, J. Hao, Z. Zuo and W. Huang, *ACS Sustainable Chem.*  
11 *Eng.*, 2023, **11**, 13616-13627.
- 12 21. J. Shen, X. Cheng, W. Wei, X. Tian and M. Ding, *ACS Catal.*, 2025, **15**, 2402-  
13 2414.
- 14 22. N. Liu, Q. Fan, J. Wei, G. Zhang, J. Sun, W. Li, C. Song and X. Guo, *ACS Catal.*,  
15 2024, **15**, 179-192.
- 16 23. Q. Zhang, S. Wang, R. Geng, P. Wang, M. Dong, J. Wang and W. Fan, *Appl.*  
17 *Catal. B Environ.*, 2023, **337**, 123013.
- 18 24. S. Song, H. Song, L. Li, S. Wang, W. Chu, K. Peng, X. Meng, Q. Wang, B. Deng,  
19 Q. Liu, Z. Wang, Y. Weng, H. Hu, H. Lin, T. Kako and J. Ye, *Nature Catal.*, 2021,  
20 **4**, 1032-1042.
- 21 25. V. L. Sushkevich, D. Palagin, M. Ranocchiari and J. A. van Bokhoven, *Science*,  
22 2017, **356**, 523-527.
- 23 26. R. Ye, L. Ma, X. Hong, T. R. Reina, W. Luo, L. Kang, G. Feng, R. Zhang, M. Fan,  
24 R. Zhang and J. Liu, *Angew. Chem. Int. Ed.*, 2024, **63**, e202317669.
- 25 27. J. Moon, Y. Cheng, L. L. Daemen, M. Li, F. Polo-Garzon, A. J. Ramirez-Cuesta  
26 and Z. Wu, *ACS Catal.*, 2020, **10**, 5278-5287.
- 27 28. S. Eckle, H.-G. Anfang and R. J. Behm, *Appl. Catal. A-Gen.*, 2011, **391**, 325-333.
- 28 29. Y. Li, N. Liu, C. Dai, R. Xu, G. Yu, N. Wang, J. Zhang and B. Chen, *Catal.*, 2021,

- 
- 1        **11**, 1444.
- 2 30. C. Qi, Y. Bi, H. Yu, H. Zhang, Q. Zhang, X. Wang, M. Fan, T. Xing, M. Wang,  
3        M. Wu and W. Wu, *Ind. Eng. Chem. Res.*, 2024, **63**, 9576-9583.
- 4 31. X. Liu, P. Si, Y. Zhang, L. Cui, Y. Feng, T. Wang, M. Zhao, F. Liu and F. Han,  
5        *Ind. Eng. Chem. Res.*, 2024, **63**, 1170-1178.
- 6 32. J. Wu, S. Song, L. Wang, R. Li, J. Wen, Y. Guo, J. Ding, D. Mei, H. Wan and G.  
7        Guan, *Chem. Eng. J.*, 2024, **499**, 156439.
- 8 33. P. Ye, G. Miao, D. Ray, Z. Tang and C. Song, *ACS Sustainable Chem. Eng.*, 2025,  
9        **13**, 7532-7540.
- 10 34. L. Wang, Y. Wang, L. Fan, H. Xu, B. Liu, J. Zhang, Y. Zhu and X. Tu, *Chem.*  
11        *Eng. J.*, 2023, **466**, 143347.
- 12
